# Supplementary material for: Linear ubiquitination by LUBEL has a role in Drosophila heat stress response
Source: PubMed Central journal article supplement (PMC5090701; doi:10.15252/embr.201642378), 2016-10-04
Supplement: EMBR-17-1624-s001.pdf [file EMBR-17-1624-s001.pdf]

Table of Contents

Figure S1 - Interaction of Ub chains and LUBEL conserved domains.

Figure S2 - Histological analysis of muscle in LUBEL mutant flies.

Table S1-2; DE immune response genes from the ANOVA-type analysis.

Table S1 - Control (*w*- parental, LUBEL mutants; *CC/SS*, *delR2* and transposon insertion (*Mi-el*) lines)

Table S2 - Pricked (*w*- parental, LUBEL mutants; *CC/SS*, *delR2* and transposon insertion (*Mi-el*) lines)

Table S3-8; Statistically significantly enriched Gene Ontology terms within the DE genes  
of the individual pairwise comparisons.

Table S3 - control *CC/SS* mutant vs. control *w*- parental

Table S4 - control *delR2* mutant vs. control *w*- parental

Table S5 - control *Mi-el* mutant vs. control *w*- parental

Table S6 - pricked *CC/SS* mutant vs. pricked *w*- parental

Table S7 - pricked *delR2* mutant vs. pricked *w*- parental

Table S8 - pricked *Mi-el* mutant vs. pricked *w*- parental

Table S9 - Primers used to clone full length LUBEL.

**Figure S1.**

Ub chain interaction of LUBEL domains. Immobilized GST-NZF, GST-UBA2, or GST-UBA1 was incubated with Lys (K) 48-, K 63-linked, or linear polyUb chains (2-7 ubiquitins) and bound Ub chains were subjected to immunoblotting using anti-Ub antibody or a linear linkage-specific Ub antibody (anti-linear Ub antibody). Loading of GST-proteins was visualized by Ponceau S staining.

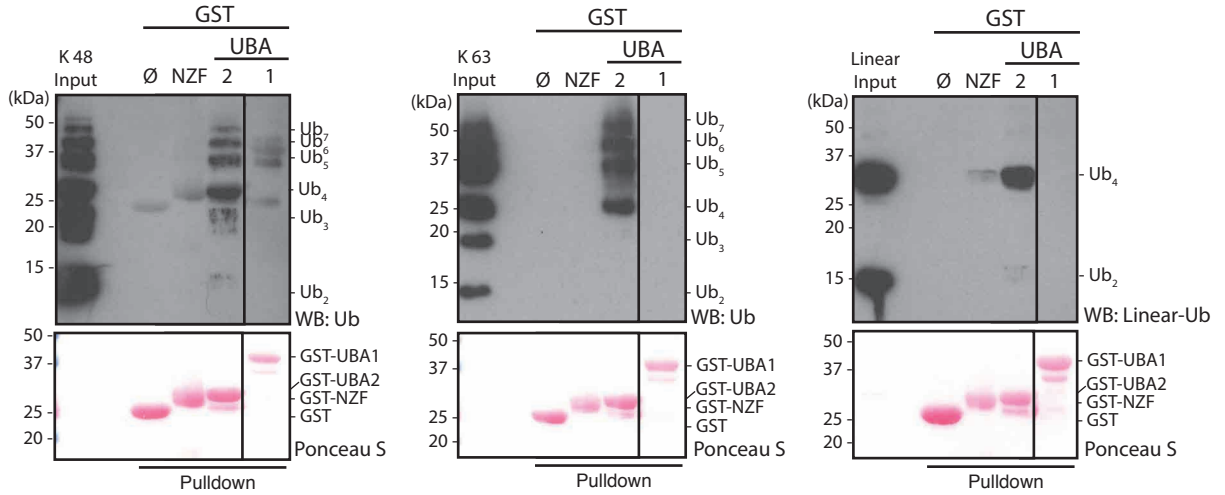

**Figure S2.**

A Histological analysis of muscle in *LUBEL* mutant flies. Hematoxylin and eosin (top panel) and actin (green) staining of thorax muscles from aged (Day 60) *delR2* female flies. Scale bars represent = 50  $\mu$ m.

B Histological analysis of muscle in *LUBEL* mutant male flies. Hematoxylin and eosin (top panel) and actin (green) staining of thorax muscles from young (Day 3) or aged (Day 50) *w-* and *CC/SS*, and *delR2* (aged only) male flies. Scale bars represent = 50  $\mu$ m.

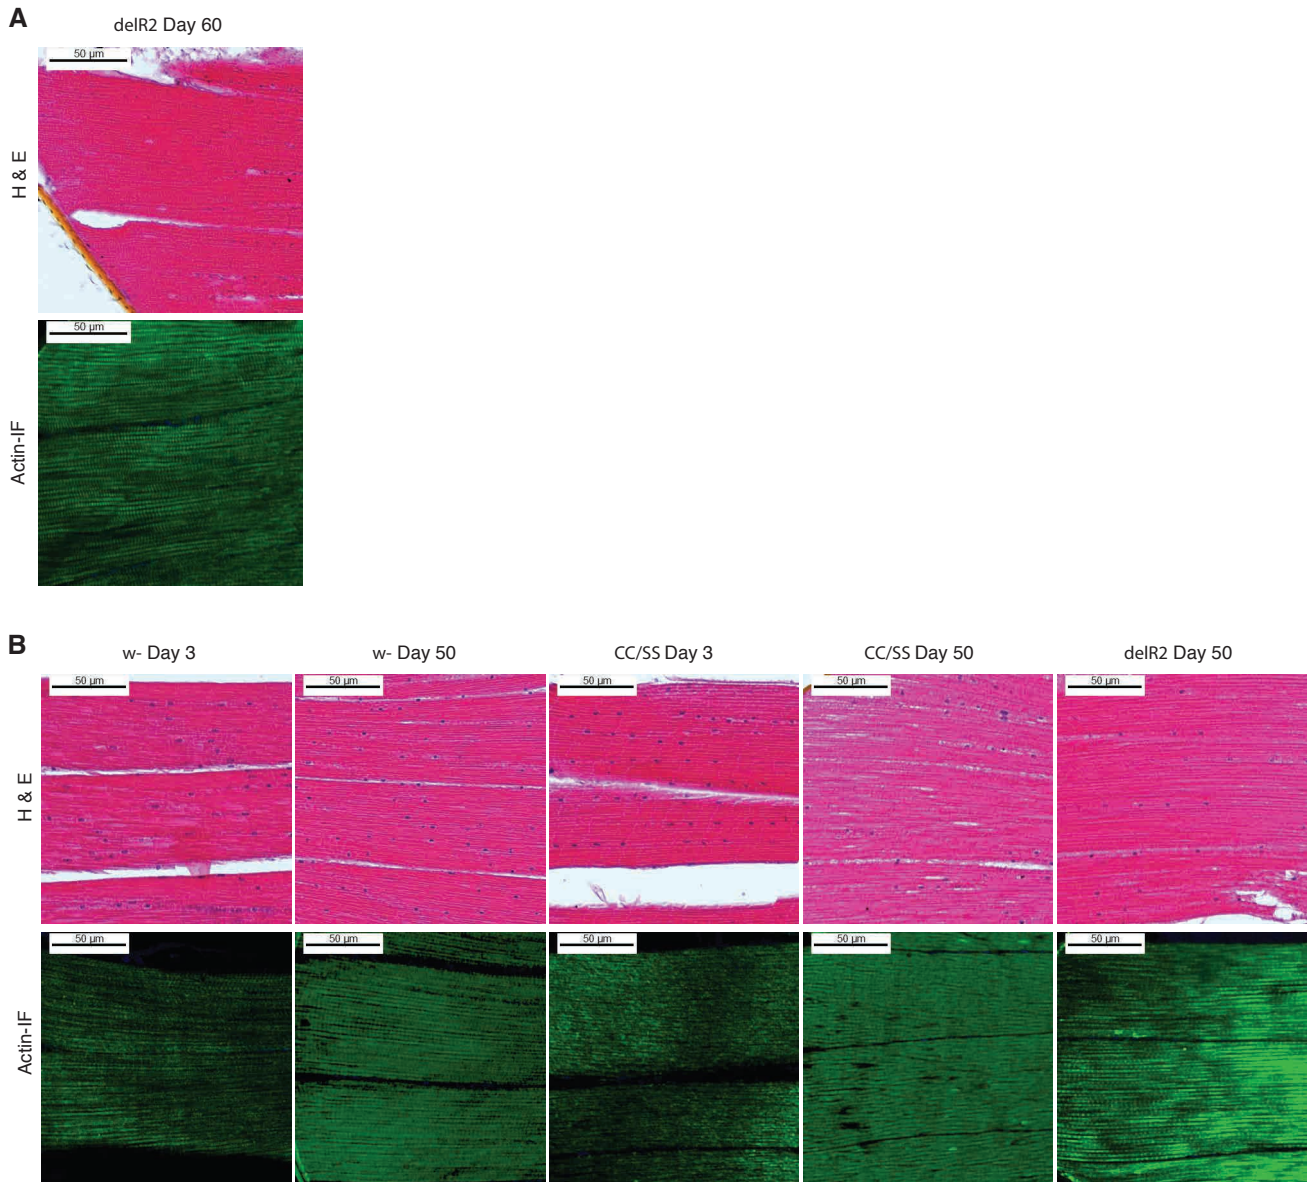

Table S1: DE (differentially expressed) immune response genes from the ANOVA-type analysis. These 11 out of a total of 402 immune response genes were statistically significantly DE between any of the four control fly lines.

Control (*w*- parental, LUBEL mutants; *CC/SS*, *delR2* and transposon insertion (*Mi-el*) lines)

|          | P.Value    | adj.P.Val  |
|----------|------------|------------|
| LysD     | 9.71E-09   | 7.84E-06   |
| LysC     | 3.14E-07   | 8.96E-05   |
| LysB     | 1.10E-06   | 0.0002009  |
| edin     | 2.76E-06   | 0.0003751  |
| Sr-CI    | 7.54E-06   | 0.00081507 |
| LysS     | 1.53E-05   | 0.00141953 |
| wisp     | 2.67E-05   | 0.00210385 |
| AttA     | 6.05E-05   | 0.00359838 |
| CG11159  | 0.00034802 | 0.01259127 |
| PGRP-SB1 | 0.00084538 | 0.02423955 |
| LysE     | 0.00113544 | 0.03018644 |

DE genes filtered with FDR < 0.05 and logFC > 1.

Table S2: DE (differentially expressed) immune response genes from the ANOVA-type analysis. These 36 out of a total of 402 immune response genes were statistically significantly DE between any of the four pricked fly lines.

Pricked (*w*- parental, LUBEL mutants; *CC/SS*, *delR2* and transposon insertion (*Mi-el*) lines)

|           | P.Value    | adj.P.Val  |
|-----------|------------|------------|
| LysD      | 1.05E-08   | 1.70E-06   |
| Nplp2     | 6.22E-08   | 5.52E-06   |
| AttA      | 8.77E-08   | 6.72E-06   |
| eater     | 3.19E-07   | 1.67E-05   |
| PGRP-SC1a | 5.86E-07   | 2.51E-05   |
| LysB      | 7.69E-07   | 3.11E-05   |
| LysP      | 9.39E-07   | 3.58E-05   |
| PGRP-SD   | 9.59E-07   | 3.65E-05   |
| Tep1      | 1.20E-06   | 4.35E-05   |
| PGRP-SC2  | 1.60E-06   | 5.27E-05   |
| edin      | 1.63E-06   | 5.35E-05   |
| LysC      | 1.76E-06   | 5.65E-05   |
| spirit    | 1.93E-06   | 6.03E-05   |
| pirk      | 2.08E-06   | 6.35E-05   |
| fon       | 2.69E-06   | 7.57E-05   |
| Hml       | 5.08E-06   | 0.00012144 |
| Sr-CI     | 5.38E-06   | 0.0001266  |
| PGRP-SB1  | 1.18E-05   | 0.00022415 |
| PGRP-SA   | 1.81E-05   | 0.00030366 |
| Tep2      | 3.07E-05   | 0.00044343 |
| CecC      | 3.22E-05   | 0.00045772 |
| LysS      | 7.60E-05   | 0.00082594 |
| PGRP-SC1b | 0.00012057 | 0.00115962 |
| CecB      | 0.0001274  | 0.00120417 |
| wisp      | 0.00014483 | 0.00132088 |
| IM23      | 0.00016661 | 0.00144474 |
| Toll-9    | 0.0003279  | 0.0023726  |
| AttD      | 0.00059408 | 0.00363418 |
| Cpr49Ac   | 0.00085878 | 0.00467034 |
| LysX      | 0.0013008  | 0.00626509 |
| CG11159   | 0.00143156 | 0.00674451 |
| proPO-A1  | 0.00205867 | 0.00885833 |
| Def       | 0.00334494 | 0.01270714 |
| Spn28Dc   | 0.00623615 | 0.0203928  |
| PGRP-SB2  | 0.01312451 | 0.03599034 |
| Bro       | 0.01663429 | 0.04317598 |

DE genes filtered with FDR < 0.05 and logFC > 1.

Table S3: Statistically significantly enriched Gene Ontology terms within the DE genes of the individual pairwise comparisons.

control *CC/SS* mutant vs. control w- parental

| Gene Ontology ID | Term                                             | P value |
|------------------|--------------------------------------------------|---------|
| GO:0010171       | body morphogenesis                               | 0.00019 |
| GO:0018126       | protein hydroxylation                            | 0.00038 |
| GO:0018401       | peptidyl-proline hydroxylation to 4-hydroxy-L-pr | 0.00038 |
| GO:0019471       | 4-hydroxyproline metabolic process               | 0.00038 |
| GO:0019511       | peptidyl-proline hydroxylation                   | 0.00038 |
| GO:0018208       | peptidyl-proline modification                    | 0.00061 |
| GO:0040003       | chitin-based cuticle development                 | 0.00119 |
| GO:1901605       | alpha-amino acid metabolic process               | 0.0017  |
| GO:0055114       | oxidation-reduction process                      | 0.00348 |
| GO:0042335       | cuticle development                              | 0.00562 |
| GO:0006575       | cellular modified amino acid metabolic process   | 0.00655 |
| GO:0006022       | aminoglycan metabolic process                    | 0.0354  |
| GO:0018193       | peptidyl-amino acid modification                 | 0.0428  |
| GO:0006520       | cellular amino acid metabolic process            | 0.0429  |

Table S4: Statistically significantly enriched Gene Ontology terms within the DE genes of the individual pairwise comparisons.

control *de/R2* mutant vs. control *w-* parental

| Gene Ontology ID | Term                                           | P value |
|------------------|------------------------------------------------|---------|
| GO:0010171       | body morphogenesis                             | 0.00023 |
| GO:0018126       | protein hydroxylation                          | 0.00046 |
| GO:0018401       | peptidyl-proline hydroxylation to 4-hydroxy-   | 0.00046 |
| GO:0019471       | 4-hydroxyproline metabolic process             | 0.00046 |
| GO:0019511       | peptidyl-proline hydroxylation                 | 0.00046 |
| GO:0018208       | peptidyl-proline modification                  | 0.00078 |
| GO:1901605       | alpha-amino acid metabolic process             | 0.00225 |
| GO:0006575       | cellular modified amino acid metabolic process | 0.00817 |
| GO:0040003       | chitin-based cuticle development               | 0.0087  |
| GO:0007606       | sensory perception of chemical stimulus        | 0.0139  |
| GO:0055114       | oxidation-reduction process                    | 0.0152  |
| GO:0042335       | cuticle development                            | 0.0294  |
| GO:0006022       | aminoglycan metabolic process                  | 0.043   |
| GO:0006508       | proteolysis                                    | 0.0494  |

Table S5: Statistically significantly enriched Gene Ontology terms within the DE genes of the individual pairwise comparisons.

control *Mi-el* mutant vs. control *w-* parental

| Gene Ontology ID | Term                                          | P value  |
|------------------|-----------------------------------------------|----------|
| GO:0017085       | response to insecticide                       | 1.40E-05 |
| GO:0009636       | response to toxic substance                   | 7.30E-05 |
| GO:0016998       | cell wall macromolecule catabolic process     | 0.00012  |
| GO:0044036       | cell wall macromolecule metabolic process     | 0.00012  |
| GO:0071554       | cell wall organization or biogenesis          | 0.00012  |
| GO:0006805       | xenobiotic metabolic process                  | 0.00038  |
| GO:0009410       | response to xenobiotic stimulus               | 0.00038  |
| GO:0071466       | cellular response to xenobiotic stimulus      | 0.00038  |
| GO:0009631       | cold acclimation                              | 0.00116  |
| GO:0014074       | response to purine-containing compound        | 0.0017   |
| GO:0031000       | response to caffeine                          | 0.0017   |
| GO:0009404       | toxin metabolic process                       | 0.00238  |
| GO:0017143       | insecticide metabolic process                 | 0.00238  |
| GO:0019730       | antimicrobial humoral response                | 0.00265  |
| GO:0009409       | response to cold                              | 0.00418  |
| GO:0006959       | humoral immune response                       | 0.00654  |
| GO:0043279       | response to alkaloid                          | 0.00679  |
| GO:0007606       | sensory perception of chemical stimulus       | 0.00758  |
| GO:0010955       | negative regulation of protein processing     | 0.00774  |
| GO:1903318       | negative regulation of protein maturation     | 0.00774  |
| GO:0043207       | response to external biotic stimulus          | 0.0102   |
| GO:0051707       | response to other organism                    | 0.0102   |
| GO:0007600       | sensory perception                            | 0.0108   |
| GO:0009607       | response to biotic stimulus                   | 0.0108   |
| GO:0050909       | sensory perception of taste                   | 0.0187   |
| GO:0030010       | establishment of cell polarity                | 0.0205   |
| GO:0009593       | detection of chemical stimulus                | 0.0264   |
| GO:0070613       | regulation of protein processing              | 0.0265   |
| GO:1903317       | regulation of protein maturation              | 0.0265   |
| GO:0006508       | proteolysis                                   | 0.0293   |
| GO:0032507       | maintenance of protein location in cell       | 0.0335   |
| GO:0010951       | negative regulation of endopeptidase activity | 0.0368   |
| GO:0045861       | negative regulation of proteolysis            | 0.0368   |
| GO:0010466       | negative regulation of peptidase activity     | 0.0406   |
| GO:0009266       | response to temperature stimulus              | 0.041    |
| GO:0045185       | maintenance of protein location               | 0.0415   |
| GO:0051651       | maintenance of location in cell               | 0.0474   |
| GO:0055114       | oxidation-reduction process                   | 0.0486   |



Table S6: Statistically significantly enriched Gene Ontology terms within the DE genes of the individual pairwise comparisons.

pricked *CC/SS* mutant vs. pricked *w-* parental

| Gene Ontology ID | Term                                             | P value  |
|------------------|--------------------------------------------------|----------|
| GO:0040003       | chitin-based cuticle development                 | 5.60E-14 |
| GO:0042335       | cuticle development                              | 1.70E-13 |
| GO:0006022       | aminoglycan metabolic process                    | 6.40E-09 |
| GO:0006030       | chitin metabolic process                         | 1.60E-08 |
| GO:1901071       | glucosamine-containing compound metabolic pr     | 4.00E-08 |
| GO:0006040       | amino sugar metabolic process                    | 4.60E-08 |
| GO:0055114       | oxidation-reduction process                      | 3.10E-05 |
| GO:0018401       | peptidyl-proline hydroxylation to 4-hydroxy-L-pr | 4.50E-05 |
| GO:0019471       | 4-hydroxyproline metabolic process               | 4.50E-05 |
| GO:0019511       | peptidyl-proline hydroxylation                   | 4.50E-05 |
| GO:0018126       | protein hydroxylation                            | 6.40E-05 |
| GO:0006035       | cuticle chitin biosynthetic process              | 0.00023  |
| GO:1901605       | alpha-amino acid metabolic process               | 0.00036  |
| GO:0006031       | chitin biosynthetic process                      | 0.00044  |
| GO:1901073       | glucosamine-containing compound biosynthetic     | 0.00044  |
| GO:0046349       | amino sugar biosynthetic process                 | 0.00076  |
| GO:0018208       | peptidyl-proline modification                    | 0.00091  |
| GO:0010038       | response to metal ion                            | 0.00091  |
| GO:0009617       | response to bacterium                            | 0.00105  |
| GO:0006023       | aminoglycan biosynthetic process                 | 0.00119  |
| GO:0009620       | response to fungus                               | 0.00159  |
| GO:0006575       | cellular modified amino acid metabolic process   | 0.0016   |
| GO:0006034       | cuticle chitin metabolic process                 | 0.00174  |
| GO:0034644       | cellular response to UV                          | 0.00174  |
| GO:0008202       | steroid metabolic process                        | 0.00192  |
| GO:0043207       | response to external biotic stimulus             | 0.0025   |
| GO:0051707       | response to other organism                       | 0.0025   |
| GO:0044550       | secondary metabolite biosynthetic process        | 0.00267  |
| GO:0009607       | response to biotic stimulus                      | 0.00268  |
| GO:0050832       | defense response to fungus                       | 0.00295  |
| GO:0007606       | sensory perception of chemical stimulus          | 0.004    |
| GO:0050830       | defense response to Gram-positive bacterium      | 0.00492  |
| GO:0006026       | aminoglycan catabolic process                    | 0.00527  |
| GO:0042438       | melanin biosynthetic process                     | 0.00544  |
| GO:0006508       | proteolysis                                      | 0.00567  |
| GO:0098542       | defense response to other organism               | 0.0089   |
| GO:0010035       | response to inorganic substance                  | 0.00995  |

|            |                                               |        |
|------------|-----------------------------------------------|--------|
| GO:1901136 | carbohydrate derivative catabolic process     | 0.0109 |
| GO:0006032 | chitin catabolic process                      | 0.0119 |
| GO:0019748 | secondary metabolic process                   | 0.0125 |
| GO:0010171 | body morphogenesis                            | 0.014  |
| GO:0034605 | cellular response to heat                     | 0.014  |
| GO:0046348 | amino sugar catabolic process                 | 0.014  |
| GO:1901072 | glucosamine-containing compound catabolic pro | 0.014  |
| GO:0006520 | cellular amino acid metabolic process         | 0.0158 |
| GO:0006081 | cellular aldehyde metabolic process           | 0.0162 |
| GO:0046189 | phenol-containing compound biosynthetic proce | 0.0162 |
| GO:0042180 | cellular ketone metabolic process             | 0.0177 |
| GO:0045455 | ecdysteroid metabolic process                 | 0.0192 |
| GO:0032787 | monocarboxylic acid metabolic process         | 0.0205 |
| GO:0060439 | trachea morphogenesis                         | 0.0242 |
| GO:0042445 | hormone metabolic process                     | 0.0269 |
| GO:1901565 | organonitrogen compound catabolic process     | 0.0274 |
| GO:0006952 | defense response                              | 0.0289 |
| GO:1901135 | carbohydrate derivative metabolic process     | 0.0299 |
| GO:0046692 | sperm competition                             | 0.0305 |
| GO:0009411 | response to UV                                | 0.034  |
| GO:0034754 | cellular hormone metabolic process            | 0.0344 |
| GO:1901617 | organic hydroxy compound biosynthetic process | 0.0344 |
| GO:0007320 | insemination                                  | 0.0376 |
| GO:0048067 | cuticle pigmentation                          | 0.0376 |
| GO:0019731 | antibacterial humoral response                | 0.0455 |
| GO:0050909 | sensory perception of taste                   | 0.0486 |
| GO:0042742 | defense response to bacterium                 | 0.0488 |

Table S7: Statistically significantly enriched Gene Ontology terms within the DE genes of the individual pairwise comparisons.

pricked *deIR2* mutant vs. pricked *w-* parental

| Gene Ontology ID | Term                                             | P value  |
|------------------|--------------------------------------------------|----------|
| GO:0006022       | aminoglycan metabolic process                    | 3.80E-07 |
| GO:0006030       | chitin metabolic process                         | 3.90E-07 |
| GO:1901071       | glucosamine-containing compound metabolic pr     | 7.60E-07 |
| GO:0006040       | amino sugar metabolic process                    | 8.30E-07 |
| GO:0040003       | chitin-based cuticle development                 | 9.70E-05 |
| GO:0010171       | body morphogenesis                               | 0.00021  |
| GO:0042335       | cuticle development                              | 0.001    |
| GO:0018401       | peptidyl-proline hydroxylation to 4-hydroxy-L-pr | 0.00193  |
| GO:0019471       | 4-hydroxyproline metabolic process               | 0.00193  |
| GO:0019511       | peptidyl-proline hydroxylation                   | 0.00193  |
| GO:0006575       | cellular modified amino acid metabolic process   | 0.002    |
| GO:0018126       | protein hydroxylation                            | 0.00234  |
| GO:0018208       | peptidyl-proline modification                    | 0.00469  |
| GO:1901135       | carbohydrate derivative metabolic process        | 0.0113   |
| GO:0007606       | sensory perception of chemical stimulus          | 0.0123   |
| GO:0006508       | proteolysis                                      | 0.0156   |
| GO:0009620       | response to fungus                               | 0.0192   |
| GO:1901605       | alpha-amino acid metabolic process               | 0.0224   |
| GO:1901136       | carbohydrate derivative catabolic process        | 0.0462   |

Table S8: Statistically significantly enriched Gene Ontology terms within the DE genes of the individual pairwise comparisons.

pricked *Mi-el* mutant vs. pricked *w-* parental

| Gene Ontology ID | Term                                                 | P value  |
|------------------|------------------------------------------------------|----------|
| GO:0040003       | chitin-based cuticle development                     | 5.40E-09 |
| GO:0006022       | aminoglycan metabolic process                        | 2.00E-08 |
| GO:0042335       | cuticle development                                  | 2.80E-08 |
| GO:0006030       | chitin metabolic process                             | 9.40E-08 |
| GO:1901071       | glucosamine-containing compound metabolic process    | 2.70E-07 |
| GO:0006040       | amino sugar metabolic process                        | 3.10E-07 |
| GO:0017085       | response to insecticide                              | 1.90E-06 |
| GO:0006805       | xenobiotic metabolic process                         | 2.90E-05 |
| GO:0009410       | response to xenobiotic stimulus                      | 2.90E-05 |
| GO:0071466       | cellular response to xenobiotic stimulus             | 2.90E-05 |
| GO:0009636       | response to toxic substance                          | 8.20E-05 |
| GO:0055114       | oxidation-reduction process                          | 0.00013  |
| GO:0006508       | proteolysis                                          | 2.00E-04 |
| GO:0009404       | toxin metabolic process                              | 0.00069  |
| GO:0017143       | insecticide metabolic process                        | 0.00069  |
| GO:0006026       | aminoglycan catabolic process                        | 0.00069  |
| GO:0006035       | cuticle chitin biosynthetic process                  | 0.00085  |
| GO:0006031       | chitin biosynthetic process                          | 0.00164  |
| GO:1901073       | glucosamine-containing compound biosynthetic process | 0.00164  |
| GO:0046349       | amino sugar biosynthetic process                     | 0.00278  |
| GO:0006959       | humoral immune response                              | 0.00333  |
| GO:0000270       | peptidoglycan metabolic process                      | 0.0043   |
| GO:0006027       | glycosaminoglycan catabolic process                  | 0.0043   |
| GO:0009253       | peptidoglycan catabolic process                      | 0.0043   |
| GO:1901136       | carbohydrate derivative catabolic process            | 0.00476  |
| GO:0006034       | cuticle chitin metabolic process                     | 0.00624  |
| GO:0007586       | digestion                                            | 0.00862  |
| GO:0014074       | response to purine-containing compound               | 0.00862  |
| GO:0031000       | response to caffeine                                 | 0.00862  |
| GO:0060439       | trachea morphogenesis                                | 0.0156   |
| GO:0008202       | steroid metabolic process                            | 0.0165   |
| GO:0045455       | ecdysteroid metabolic process                        | 0.0217   |
| GO:0003383       | apical constriction                                  | 0.0276   |
| GO:0001101       | response to acid chemical                            | 0.0314   |
| GO:0007606       | sensory perception of chemical stimulus              | 0.0363   |
| GO:0006955       | immune response                                      | 0.0386   |
| GO:0006023       | aminoglycan biosynthetic process                     | 0.0387   |
| GO:0006032       | chitin catabolic process                             | 0.0387   |

|            |                                                   |        |
|------------|---------------------------------------------------|--------|
| GO:0010951 | negative regulation of endopeptidase activity     | 0.0387 |
| GO:0019748 | secondary metabolic process                       | 0.042  |
| GO:0034754 | cellular hormone metabolic process                | 0.0429 |
| GO:0043279 | response to alkaloid                              | 0.0442 |
| GO:0060438 | trachea development                               | 0.0442 |
| GO:0010466 | negative regulation of peptidase activity         | 0.0449 |
| GO:0046348 | amino sugar catabolic process                     | 0.0449 |
| GO:0070252 | actin-mediated cell contraction                   | 0.0449 |
| GO:1901072 | glucosamine-containing compound catabolic process | 0.0449 |
| GO:0042445 | hormone metabolic process                         | 0.0489 |
| GO:0019730 | antimicrobial humoral response                    | 0.0495 |

Table S9.

Primers used to amplify and clone full length LUBEL. Five fragments were amplified to clone Dmel\_CG11321, isoform E in pAMW insect expression vector by Gibson assembly. Fragments 1 to 4 were amplified from cDNA of male adult fly, while fragment 5 was amplified from pGEX6p1-LUBEL-RBR-C.

**1st fragment**

Fwd 5'-TTCTGAAGAGGACTTGAATCAATGACGACCCACCAGTTGCTAAA-3'

Rev 5'-TCAGACTCCAGATCGGAGTAAATGCGACTGGTTCTGGCCGAG-3'

**2nd fragment**

Fwd 5'-GAACCAGTCGCATTTACTCCGATCTGGAGTCTGAGGGATCGGG-3'

Rev 5'-GGTTCTGCTTGGCCTGGTTCTGTTCCATGTTGCCAATGAG-3'

**3rd fragment**

Fwd 5'-CAACA TGGAACAGAACCAGGCCAAGCAGAACCAGGAGG-3'

Rev 5'-CGGACAACGTTCGGATTTTGGAGAACTGACTGTTTCCCCTATGGG-3'

**4th fragment**

Fwd 5'-GGGAAACAGTCAGTTCTCCAAAATCCGAACAGT TGTCCG-3'

Rev 5'-GGGATAGCTGTTTCATGCAGAGCTCGCACTCCTGC-3'

**5th fragment**

Fwd 5'-CAGGAGTGCGAGCTCTGCATGAACAGCTATCCCATGAATC-3'

Rev 5'-GGTTCCTTCACAAAGATCCTGTCATGCCGATTTTCAGTGGTATAT-3'
